# Supplementary material for: Impaired IgM Memory B Cell Function Is Common in Coeliac Disease but Conjugate Pneumococcal Vaccination Induces Robust Protective Immunity
Source: MDPI journal article supplement (doi:10.3390/vaccines12020214), 2024-02-19
Supplement: s1 [file s1]

Supplementary Table S1. Participant clinical information.

| ID <sup>A</sup> | Year CD diagnosed <sup>B</sup> | Yrs on GFD | Sex | Age (yr) | Age at CD diagnosis (yr) <sup>C</sup> | HLA-DQ <sup>D</sup> | Medical History <sup>E</sup>                  | CD Serology <sup>F</sup> | HJB <sup>G</sup> | PRC % <sup>H</sup> | Complement studies <sup>I</sup> | Spleen volume (cm <sup>3</sup> ) | Vax <sup>J</sup> |
|-----------------|--------------------------------|------------|-----|----------|---------------------------------------|---------------------|-----------------------------------------------|--------------------------|------------------|--------------------|---------------------------------|----------------------------------|------------------|
| TC01            | 2007                           | 13         | F   | 61       | 49                                    | 2.5 / 8             | Nil of note                                   | NAD <sup>K</sup>         | Neg              | 0.8                | NAD                             | 158                              | PPV              |
| TC02            | 2010                           | 10         | M   | 66       | 57                                    | 2.5<br>Het          | Previous pneumococcal vax                     | NAD                      | Neg              | 5.6                | NAD                             | 151                              |                  |
| TC03            | 1966                           | 54         | M   | 56       | 3                                     | 2.5 / 8             | Thyroid nodules                               | NAD                      | Pos              | 1                  | NAD                             | 251                              | PCV              |
| TC04            | 2015                           | 5          | F   | 44       | 40                                    | 2.5<br>Het          | Ductal carcinoma in situ, Grave's disease     | NAD                      | Neg              | 0.4                | NAD                             | 228                              | PCV              |
| TC05            | 2017                           | 3          | F   | 26       | 24                                    | 8 Het               | Nil of note                                   | TTG 31                   | Neg              | 0                  | NAD                             | 223                              |                  |
| TC06            | 1997                           | 23         | M   | 68       | 46                                    | 2.2                 | Young's Syndrome, previous pneumococcal vax   | NAD                      | Neg              | 0                  | NAD                             | 164                              |                  |
| TC07            | 2017                           | 3          | F   | 26       | 24                                    | 2.5<br>Het          | Nil of note                                   | NAD                      | Neg              | 0.8                | C4 0.13 g/L                     | 270                              |                  |
| TC08            | 2010                           | 10         | F   | 61       | 52                                    | 2.5/ 8              | Nil of note                                   | NAD                      | Neg              | 0                  | C3 0.8 g/L, C4 0.14 g/L         | 75                               | PCV              |
| TC09            | 2002                           | 18         | F   | 65       | 48                                    | 2.5<br>Het          | Nil of note                                   | NAD                      | Neg              | 0.8                | NAD                             | 90                               | PCV              |
| TC10            | 2015                           | 5          | F   | 70       | 66                                    | 2.5<br>Het          | Previous pneumococcal vax, Hashimoto's (2012) | NAD                      | Neg              | 0                  | NAD                             | 198                              |                  |
| TC11            | 2017                           | 3          | F   | 28       | 26                                    | 2.5<br>Homo         | Nil of note                                   | NAD                      | Neg              | 0.7                | NAD                             |                                  | PPV              |
| TC12            | 2009                           | 11         | F   | 62       | 52                                    | 2.5<br>Homo         | Nil of note                                   | NAD                      | Neg              | 0.8                | NAD                             | 360                              | PPV              |
| TC13            | 2019                           | 1          | F   | 22       | 22                                    | 2.5<br>Het          | Nil of note                                   | NAD                      | Neg              | 0.3                | NAD                             | 330                              |                  |
| TC14            | 2013                           | 7          | M   | 58       | 52                                    | 2.5 / 2.2           | Hashimoto's (2016)                            | NAD                      | Neg              | 1.2                | NAD                             | 183                              | PCV              |

|      |      |    |   |    |    |             |                                                |        |     |     |                             |     |     |
|------|------|----|---|----|----|-------------|------------------------------------------------|--------|-----|-----|-----------------------------|-----|-----|
| TC15 | 2013 | 6  | M | 30 | 25 | 2.2 / 8     | Pneumonia as a child                           | NAD    | Neg | 0   | NAD                         | 350 | PPV |
| TC17 | 2008 | 12 | F | 35 | 24 | 2.5<br>Het  | Nil of note                                    | NAD    | Neg | 1.6 | NAD                         | 164 | PPV |
| TC18 | 2009 | 11 | F | 51 | 41 | 2.5<br>Het  | Nil of note                                    | NAD    | Neg | 0   | NAD                         | 260 | PCV |
| TC19 | 2012 | 8  | F | 42 | 35 | 2.5 / 8     | Nil of note                                    | NAD    | Neg | 0.4 | NAD                         | 121 | PPV |
| TC20 | 2016 | 4  | F | 28 | 25 | 2.5 / 8     | Nil of note                                    | NAD    | Neg | 1.2 | C3 1.98 g/L                 | 213 | PPV |
| TC21 | 2016 | 4  | F | 68 | 65 | 2.5<br>Het  | Nil of note                                    | NAD    | Neg | 2   | NAD                         | 180 | PPV |
| TC22 | 1964 | 29 | M | 58 | 29 | 2.5<br>Het  | Nil of note                                    | DGP 71 | Neg | 0   | NAD                         | 107 | PPV |
| TC23 | 2005 | 16 | M | 66 | 50 | 2.5<br>Het  | Nil of note                                    | NAD    | Neg | 2.4 | NAD                         | 51  | PCV |
| TC24 | 2018 | 3  | F | 51 | 48 | 8           | Vitiligo                                       | NAD    | Neg | 0.4 | NAD                         | 234 |     |
| TC25 | 2013 | 8  | F | 52 | 44 | 2.5<br>Het  | Nil of note                                    | NAD    | Neg | 0.4 | NAD                         | 201 |     |
| TC26 | 2000 | 21 | F | 64 | 43 | 2.5         | Pneumonia 2019                                 | NAD    | Neg | 0   | NAD                         | 240 | PCV |
| TC27 | 1984 | 37 | F | 67 | 30 | 2.5<br>Het  | Nil of note                                    | NAD    | Neg | 0   | NAD                         | 189 |     |
| TC28 | 2019 | 2  | F | 31 | 29 | 2.5<br>Homo | Previous pneumococcal<br>vax                   | NAD    | Neg | 0   | NAD                         | 163 |     |
| TC29 | 2017 | 4  | F | 47 | 43 | 2.5<br>Het  | RCD                                            | TTG 35 | Neg | 0.4 | NAD                         | 175 | PPV |
| TC30 | 2004 | 17 | M | 57 | 40 | ?2.2/8      | Nil of note                                    | TTG 61 | Neg | 0   | NAD                         | 251 | PPV |
| TC31 | 2015 | 6  | F | 41 | 35 | 2.5<br>Het  | Nil of note                                    | NAD    | Neg | 0   | C3 0.79 g/L                 | 128 | PCV |
| TC32 | 2013 | 8  | M | 63 | 55 | 2.5<br>Het  | Nil of note                                    | NAD    | Neg | 0   | C3 0.74 g/L,<br>C4 0.12 g/L | 291 | PPV |
| TC33 | 1997 | 24 | M | 70 | 46 | 2.5<br>Het  | Type 2 DM, Previous<br>pneumococcal vax (2018) | NAD    | Neg | 0   | NAD                         | 88  |     |

|      |      |    |   |    |    |             |                                                                                             |          |     |     |                             |          |     |
|------|------|----|---|----|----|-------------|---------------------------------------------------------------------------------------------|----------|-----|-----|-----------------------------|----------|-----|
| TC34 | 2019 | 2  | M | 71 | 69 | 2.2/8       | Idiopathic thrombocytopaenia/ RCD                                                           | Not Done |     | 0   | Not done                    | Not done |     |
| TC35 | 2001 | 20 | F | 65 | 45 | 2.5<br>Het  | Nil of note                                                                                 | NAD      | Neg | 0.4 | NAD                         | 76       | PCV |
| TC36 | 2010 | 11 | F | 62 | 51 | 2.5<br>Het  | Neutropenia                                                                                 | NAD      | Neg | 0.4 | NAD                         | 305      | PPV |
| TC37 | 2019 | 2  | F | 68 | 66 | 2.5<br>Het  | Leiomyosarcoma 2007,<br>Pneumonia 2018<br>(hospitalised), previous<br>pneumococcal vax 2018 | NAD      | Neg | 0.4 | NAD                         | 196      |     |
| TC38 | 2012 | 9  | F | 64 | 55 | 2.5         | Hashimoto's                                                                                 | NAD      | Neg | 0.8 | NAD                         | 94       | PCV |
| TC39 | 2016 | 5  | M | 67 | 62 | 2.5<br>Het  | Previous pneumococcal<br>vax                                                                | TTG 55   | Neg | 0.4 | NAD                         | 25       |     |
| TC40 | 2007 | 14 | F | 37 | 23 | 8           | Narcolepsy                                                                                  | NAD      | Neg | 0   | NAD                         | 485      | PCV |
| TC41 |      |    | F | 59 |    | 2.5<br>Het  | Hemochromatosis                                                                             | NAD      | Neg | 0   | NAD                         |          |     |
| TC42 | 2009 | 12 | F | 65 | 53 | 2.5<br>Het  | Previous pneumococcal<br>vax                                                                | NAD      | Neg | 0.4 | C4 0.12 g/L                 | 210      |     |
| TC43 | 2014 | 7  | F | 32 | 25 | 2.5<br>Homo | Nil of Note                                                                                 | NAD      | Neg | 0.4 | C3 0.70 g/L,<br>C4 0.12 g/L | 265      |     |
| TC44 | 2010 | 11 | F | 57 | 46 | 2.5<br>Het  | Rheumatoid Arthritis                                                                        | NAD      | Neg | 0   | NAD                         | Not done | PCV |
| TC45 | 1975 | 46 | M | 65 | 19 | 2.5<br>Het  | Nil of Note                                                                                 | NAD      | Neg | 0.4 | NAD                         | Not done | PPV |
| TC46 | 2019 | 2  | F | 59 | 57 | 2.5<br>Het  | Nil of Note                                                                                 | NAD      | Neg | 0   | NAD                         | 296      | PCV |
| TC47 | 2012 | 9  | F | 49 | 40 | 2.5<br>Het  | Nil of Note                                                                                 | NAD      | Neg | 0.4 | C3 0.71 g/L,<br>C4 0.14 g/L | Not done | PCV |
| TC48 | 2015 | 6  | F | 27 | 21 | 2.5<br>Het  | Proctitis                                                                                   | NAD      | Neg | 0.4 | NAD                         | Not done | PCV |

|      |          |    |   |    |    |              |                                                                    |                    |     |                       |             |          |     |
|------|----------|----|---|----|----|--------------|--------------------------------------------------------------------|--------------------|-----|-----------------------|-------------|----------|-----|
| TC49 | 2013     | 8  | F | 28 | 20 | 2.5<br>Homo  | Hashimoto's disease<br>(2019)                                      | NAD                | Neg | 0                     | C4 0.14 g/L | 247      |     |
| TC50 | 2002     | 19 | F | 25 | 6  | 2.5<br>Het   | Nil of Note                                                        | NAD                | Neg | 1.9                   | NAD         | 373      |     |
| TC51 | 2010     | 11 | F | 41 | 30 | 2.5<br>Het   | Psoriatic Arthritis (2013)                                         | TTG 25             | Neg | 1.4                   | NAD         | 342      | PPV |
| TC52 | 2012     | 9  | F | 43 | 34 | 2.5/2.2      | Nil of Note                                                        | NAD                | Neg | 1.6                   | C4 0.13 g/L | Not done | PPV |
| TC53 | 2020     | 1  | F | 66 | 65 | 2 / 8        | Kidney donor,<br>pneumonia 2018,<br>Rheumatoid Arthritis<br>(2019) | Pos                | Pos | 41.3                  | NAD         | 33       |     |
| TC54 | 2017     | 4  | M | 59 | 55 | 2.5 /<br>2.2 | Neutropoenia                                                       | NAD                | Neg | 0.8                   | NAD         | Not done | PPV |
| TC55 | 1999     | 22 | F | 61 | 39 | 2.5<br>Homo  | Pneumonia 2015                                                     | TTG 33             | Neg | 1.2                   | NAD         | Not done | PPV |
| TC56 | 2008     | 13 | F | 34 | 21 | 2.5/ 8       | Thyroid cyst                                                       | NAD                | Neg | 0                     | NAD         | Not done | PPV |
| TC57 | 2012     | 8  | F | 74 | 66 | 2.5<br>Het   | Refractory coeliac disease                                         |                    | Neg | 0.4                   | NAD         | Not done |     |
| TC58 |          |    | M | 71 |    | 2.5          | Hemochromatosis,<br>previous pneumococcal<br>vax                   | NAD                | Neg | 0.4                   | NAD         | Not done |     |
| TC59 | 2003     | 18 | F | 63 | 45 |              | Fibromyalgia, asthma,<br>TIA                                       | NAD                | Neg | 0.8                   | NAD         | Not done |     |
| TC60 | 2004     | 17 | F | 51 | 34 | 2.5/2        | Hypertension,<br>schizophrenia                                     | TTG 21             | Neg |                       | NAD         | Not done |     |
| AC01 | Nov 2020 | <1 | F | 28 | 28 | 8            | Crohn's disease (2017)                                             | TTG 965,<br>DGP 82 | Neg | 0.4 (BS);<br>0.4 (FU) | NAD         | 305      | N/A |
| AC02 | Dec 2020 | <1 | F | 36 | 36 | 2.5<br>Het   | Nil of note                                                        | TTG 181,<br>DGP 36 | Pos | 1.1 (BS)              | NAD         | 121      | N/A |
| AC03 | Dec 2020 | <1 | F | 33 | 33 | 2.5<br>Het   | Gestational Diabetes                                               | TTG 42,<br>DGP 138 | Neg | 0 (BS); 0<br>(FU)     | C3 0.76g/L  | 275      | N/A |

|      |          |     |   |    |     |             |                                                                                                                           |                     |     |                     |            |          |     |
|------|----------|-----|---|----|-----|-------------|---------------------------------------------------------------------------------------------------------------------------|---------------------|-----|---------------------|------------|----------|-----|
| AC04 | May 2021 | <1  | M | 30 | 30  | 8           | Nil of note                                                                                                               | TTG 660,<br>DGP 41  | Neg | 0 (BS);<br>0.4 (FU) | NAD        | Not done | N/A |
| AC05 | May 2021 | <1  | M | 28 | 28  | 2.5<br>Homo | Palmoplantar<br>keratoderma                                                                                               | TTG 884,<br>DGP 551 | Neg | 0.4 (BS);<br>0 (FU) | C4 0.13g/L | Not done | N/A |
| AC06 | Sep 2021 | <1  | M | 34 | 34  | 2.5<br>Het  | Nil of note                                                                                                               | TTG 758,<br>DGP 115 | Neg | 0 (BS); 0<br>(FU)   |            |          | N/A |
| SP01 | N/A      | N/A | F | 62 | N/A | 2.5<br>Homo | Coeliac disease (2006),<br>splenectomy 1974 for<br>idiopathic<br>thrombocytopaenia                                        | NAD                 | Pos | 34.9                | NAD        | N/A      | N/A |
| SP02 | N/A      | N/A | F | 63 | N/A | Neg         | Splenectomy 2013 for<br>pseudomyxoma peritonei                                                                            | NAD                 | Pos | 39.9                | NAD        | N/A      | N/A |
| SP03 | N/A      | N/A | F | 65 | N/A | 2.2/8       | 1997 splenectomy for<br>idiopathic<br>thrombocytopaenia                                                                   | NAD                 | Pos | 39.8                | NAD        | N/A      | N/A |
| SP04 | N/A      | N/A | F | 47 | N/A | 2.2         | 2017 splenectomy for<br>idiopathic<br>thrombocytopaenia,<br>partial nephrectomy,<br>renal cell carcinoma,<br>hypertension | NAD                 | Pos | 6.5                 | NAD        | N/A      | N/A |
| SP05 | N/A      | N/A | F | 55 | N/A | 2.2         | 2006 splenectomy for<br>incidental benign tumour                                                                          | NAD                 | Pos | 42.6                | NAD        | N/A      | N/A |
| SP06 | N/A      | N/A | M | 58 | N/A |             | 1979 splenectomy for<br>Hodgkin's Lymphoma                                                                                | TTG 336             | Pos |                     | NAD        | N/A      | N/A |
| SP07 | N/A      | N/A | F | 63 | N/A | 2.5 het     | 1998 – Motor vehicle<br>accident, coeliac disease<br>(2016)                                                               | NAD                 | Neg | 3.1                 | TTG 336    | N/A      | N/A |
| SP08 | N/A      | N/A | M | 39 | N/A | 2.5 het     | 2008 splenectomy for<br>idiopathic                                                                                        | NAD                 | Pos | 25.9                | NAD        | N/A      | N/A |

|      |     |     |   |    |     |            |                                                                                             |     |     |      |     |     |     |
|------|-----|-----|---|----|-----|------------|---------------------------------------------------------------------------------------------|-----|-----|------|-----|-----|-----|
|      |     |     |   |    |     |            | thrombocytopaenia,<br>hypothyroidism                                                        |     |     |      |     |     |     |
| SP09 | N/A | N/A | F | 64 | N/A | 2.5/8      | 1975 – splenectomy for<br>motor vehicle accident                                            | NAD | Pos | 40.4 | NAD | N/A | N/A |
| SP10 | N/A | N/A | M | 51 | N/A | 2.2        | 1982 – Splenectomy for<br>spherocytosis, Ewing's<br>sarcoma, hypertension,<br>renal calculi | NAD | Pos | 30.0 | NAD | N/A | N/A |
| SP11 | N/A | N/A | F | 62 | N/A | 2.5/7      | 1982 – splenectomy for<br>spherocytosis,<br>hypertension                                    |     | Pos | 25.5 |     | N/A | N/A |
|      |     |     |   |    |     |            |                                                                                             |     |     |      |     |     |     |
| HV01 | N/A | N/A | M | 26 |     | 2.5<br>Het | Nil of Note                                                                                 | NAD | Neg | 0    | NAD | N/A | N/A |
| HV02 | N/A | N/A | M | 21 |     | 2.2/7      | Nil of Note                                                                                 | NAD | Neg | 0.4  | NAD | N/A | N/A |
| HV03 | N/A | N/A | M | 24 |     | Neg        | Nil of Note                                                                                 | NAD | Neg | 0    | NAD | N/A | N/A |
| HV04 | N/A | N/A | M | 30 |     | Neg        | Nil of Note                                                                                 | NAD | Neg | 0    | NAD | N/A | N/A |
| HV05 | N/A | N/A | F | 25 |     | Neg        | Pneumonia as teenager                                                                       | NAD | Neg | 0.4  | NAD | N/A | N/A |
| HV06 | N/A | N/A | F | 52 |     | Neg        | Nil of Note                                                                                 | NAD | Neg | 0    | NAD | N/A | N/A |
| HV07 | N/A | N/A | F | 24 |     | 8 Het      | Nil of Note                                                                                 | NAD | Neg | 0    | NAD | N/A | N/A |
| HV08 | N/A | N/A | M | 24 |     |            | Nil of Note                                                                                 | NAD | Neg | 1.2  | NAD | N/A | N/A |
| HV09 | N/A | N/A | F | 45 |     | Neg        | Nil of Note                                                                                 | NAD | Neg | 2.0  | NAD | N/A | N/A |
| HV10 | N/A | N/A | F | 25 |     | Neg        | Nil of Note                                                                                 | NAD | Neg | 0.0  | NAD | N/A | N/A |
| HV11 | N/A | N/A | F | 28 |     | Neg        | Nil of Note                                                                                 | NAD | Neg | 0.0  | NAD | N/A | N/A |
| HV12 | N/A | N/A | M | 25 |     | 2.2        | Elevated IgE                                                                                | NAD | Neg | 0.4  | NAD | N/A | N/A |
| HV13 | N/A | N/A | F | 62 |     | 2.5/2.2    | Nil of Note                                                                                 | NAD | Pos | 1.6  | NAD | N/A | N/A |
| HV14 | N/A | N/A | F | 51 |     | 2.5<br>Het | Pituitary adenoma                                                                           | NAD | Neg | 0.8  | NAD | N/A | N/A |
| HV15 | N/A | N/A | F | 43 |     | 2.5<br>Het | Nil of Note                                                                                 | NAD | Neg | 0    | NAD | N/A | N/A |

<sup>A</sup> Table shading indicate the following cohorts: dark blue = treated CD (TC); light blue = active CD (AC); purple = splenectomised (SP); green = healthy volunteer (HV).

<sup>B</sup> Dx; diagnosis

<sup>C</sup> Bold; patients diagnosed >50 years of age

<sup>D</sup> HLA; human leukocyte antigen, Het; heterozygous, Homo; homozygous

<sup>E</sup> Pink shading indicates patients with autoimmune disease or refractory coeliac disease (RCD) categorised as complicated CD

<sup>F</sup> CD serology normal ranges: tissue transglutaminase (TTG) <20 and deamidated gliadin peptide (DGP) <20.

<sup>G</sup> HJB; Howell-Jolly bodies

<sup>H</sup> PRC: Pitted red cell percentage

<sup>I</sup> Complement normal ranges: C3, 0.8-1.6g/L; C4, 0.16-0.48g/L

<sup>J</sup> Vax: indicates participants who received either 23vPPV or PCV13 as part of this study.

<sup>K</sup> NAD: no abnormalities detected

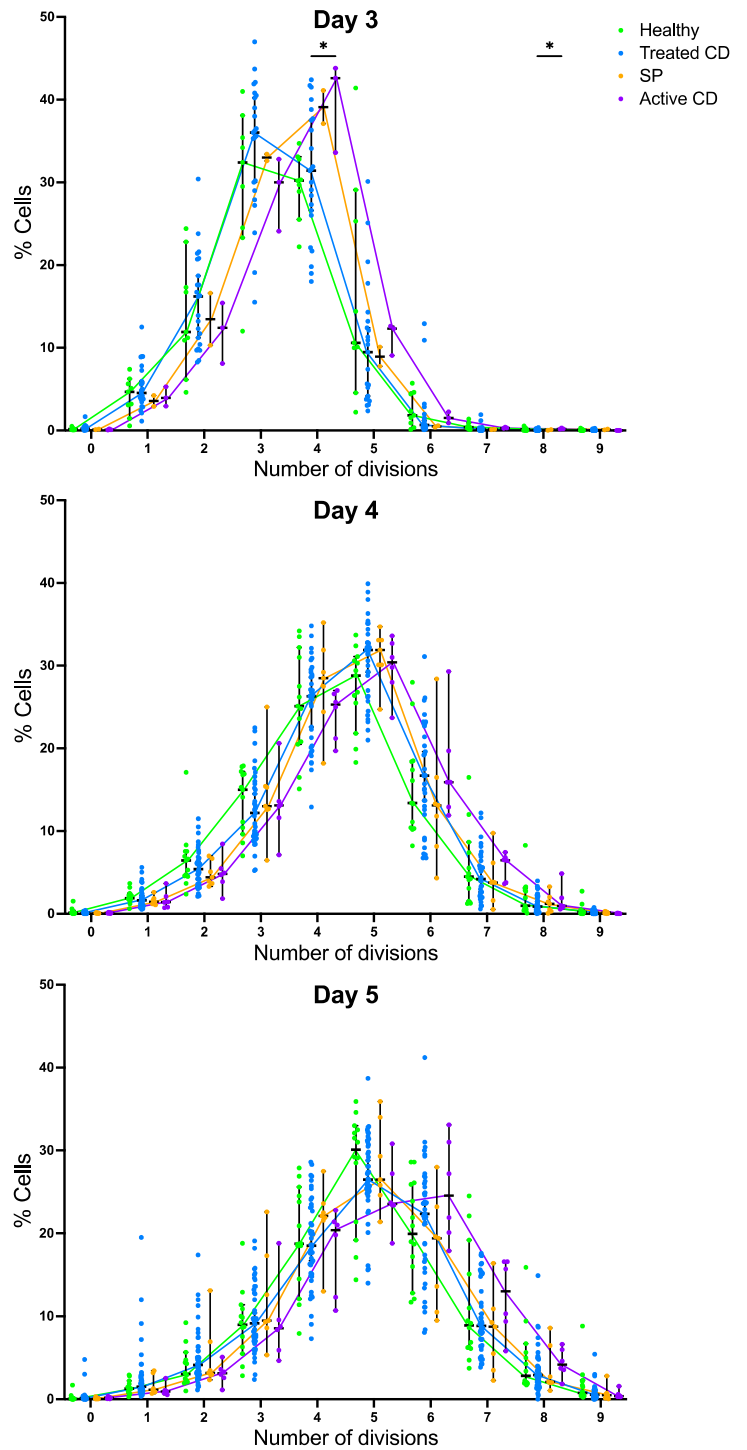

**Supplementary Figure S1.** Division kinetics following TI-stimulation of IgM memory B cells. The proportion of TI-stimulated cells within each division are shown at day 3, 4 and 5. Data are shown for each participant group; healthy, treated CD, splenectomised (SP) and active CD. Frequencies are compared by Mann-Whitney U-tests (two-tailed). Horizontal lines on graphs indicate median and error bars indicate 95% confidence intervals. \*  $P < 0.05$ .



**Supplementary Table S2. Pneumococcal vaccine adverse reactions.**

| ID   | Vaccine | Reaction Y/N | Comments                                                                                   |
|------|---------|--------------|--------------------------------------------------------------------------------------------|
| TC01 | 23vPPV  | N            |                                                                                            |
| TC03 | PCV13   | Y            | Sore arm – injection site.                                                                 |
| TC04 | PCV13   | N            |                                                                                            |
| TC08 | PCV13   | Y            | Sore arm – injection site.                                                                 |
| TC09 | PCV13   | N            |                                                                                            |
| TC11 | 23vPPV  | N            |                                                                                            |
| TC12 | 23vPPV  | N            |                                                                                            |
| TC14 | PCV13   | N            |                                                                                            |
| TC15 | 23vPPV  | N            |                                                                                            |
| TC17 | 23vPPV  | Y            | Sore arm – injection site.                                                                 |
| TC18 | PCV13   | N            |                                                                                            |
| TC19 | 23vPPV  | Y            | Sore arm – injection site.                                                                 |
| TC20 | 23vPPV  | Y            | Sore arm – injection site.                                                                 |
| TC21 | 23vPPV  | N            |                                                                                            |
| TC22 | 23vPPV  | N            |                                                                                            |
| TC23 | PCV13   | N            |                                                                                            |
| TC26 | PCV13   | Y            | Tiredness, headaches, flu-like symptoms. Settled after one week.                           |
| TC29 | 23vPPV  | N            |                                                                                            |
| TC30 | 23vPPV  | N            |                                                                                            |
| TC31 | PCV13   | N            |                                                                                            |
| TC32 | 23vPPV  | N            |                                                                                            |
| TC35 | PCV13   | N            |                                                                                            |
| TC36 | 23vPPV  | Y            | Shoulder bursitis attributed to a high (bursal) injection. Settled with conservative care. |
| TC38 | PCV13   | Y            | Sore arm – injection site.                                                                 |
| TC40 | PCV13   | Y            | Sore arm – injection site.                                                                 |
| TC44 | PCV13   | N            |                                                                                            |
| TC45 | 23vPPV  | N            |                                                                                            |
| TC46 | PCV13   | N            |                                                                                            |
| TC47 | PCV13   | Y            | Sore arm – injection site.                                                                 |
| TC48 | PCV13   | N            |                                                                                            |
| TC51 | 23vPPV  | Y            | Sore arm – injection site.                                                                 |
| TC52 | 23vPPV  | N            |                                                                                            |
| TC54 | 23vPPV  | N            |                                                                                            |
| TC55 | 23vPPV  | N            |                                                                                            |
| TC56 | 23vPPV  | N            |                                                                                            |
